# Supplementary material
Source: PubMed Central journal article supplement (PMC2838312)

## **Enhanced Hypothalamic Leptin Signaling in Mice Lacking Dopamine D2 Receptors**

Kyu Seok Kim<sup>1\*</sup>, Ye Ran Yoon<sup>1\*</sup>, Hyo Jin Lee<sup>1\*</sup>, Sehyoun Yoon<sup>1\*</sup>, Sa-Yong Kim<sup>1</sup>, Seung Woo Shin<sup>1</sup>, Juan Ji An<sup>1, 2</sup>, Minseon Kim<sup>3</sup>, Se-Young Choi<sup>4</sup>, Woong Sun<sup>5</sup> and Ja-Hyun Baik<sup>1</sup>

### **Supplemental Data**

#### **LEGENDS FOR SUPPLEMENTAL FIGURE**

##### **Supplemental Figure S1. Effects of haloperidol on leptin effect in WT and D2R<sup>-/-</sup> mice**

Either leptin or haloperidol or together with them were administrated intracerebroventricularly into 10~12 week-old WT and D2R<sup>-/-</sup> mice that had been fasted for 14hr. Cumulative food intake, body weight and activity were measured at 2h (A), 6hr (B) and 24hr(C) after injection (n=4~8 for each WT and D2R<sup>-/-</sup> groups). All values are expressed as means  $\pm$  SEM (\*P, †P <0.05, \*\*P, ††P <0.01 and \*\*\*P, †††P < 0.001, †P : Versus saline within same group, \*P: Between genotype.

**Supplemental Fig. S2. Effects of D2R activation on leptin-mediated pSTAT3 induction in the arcuate nucleus(ARC) of hypothalamus from WT and D2R<sup>-/-</sup> mice (with lower magnification);** Representative immunofluorescence images of leptin-induced phosphorylation levels of pSTAT3 with or without quinpirole treatment in the ARC region of WT (A) and D2R<sup>-/-</sup> mice(B) were taken at x200 magnification.

**A** *Fig. S1*

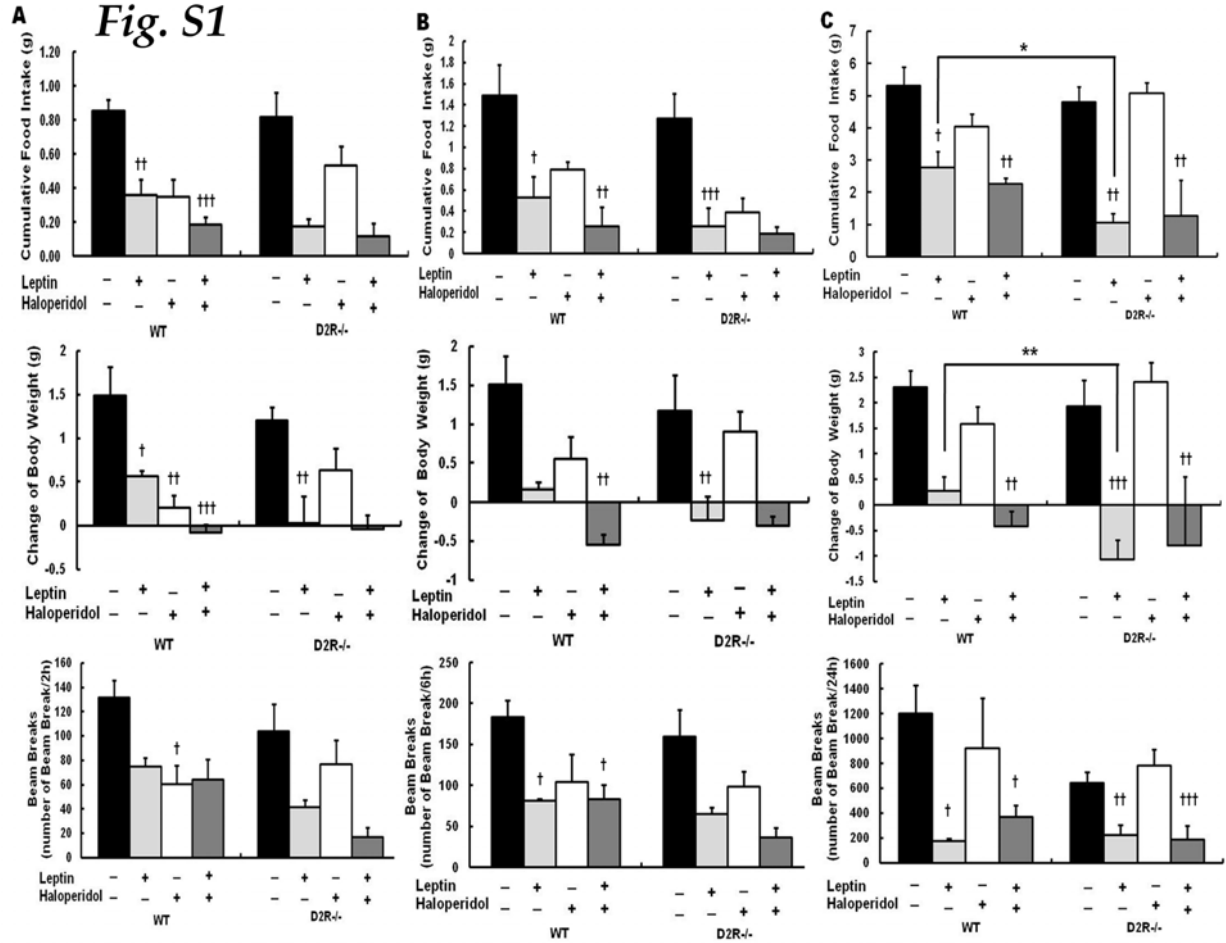

Fig. S2

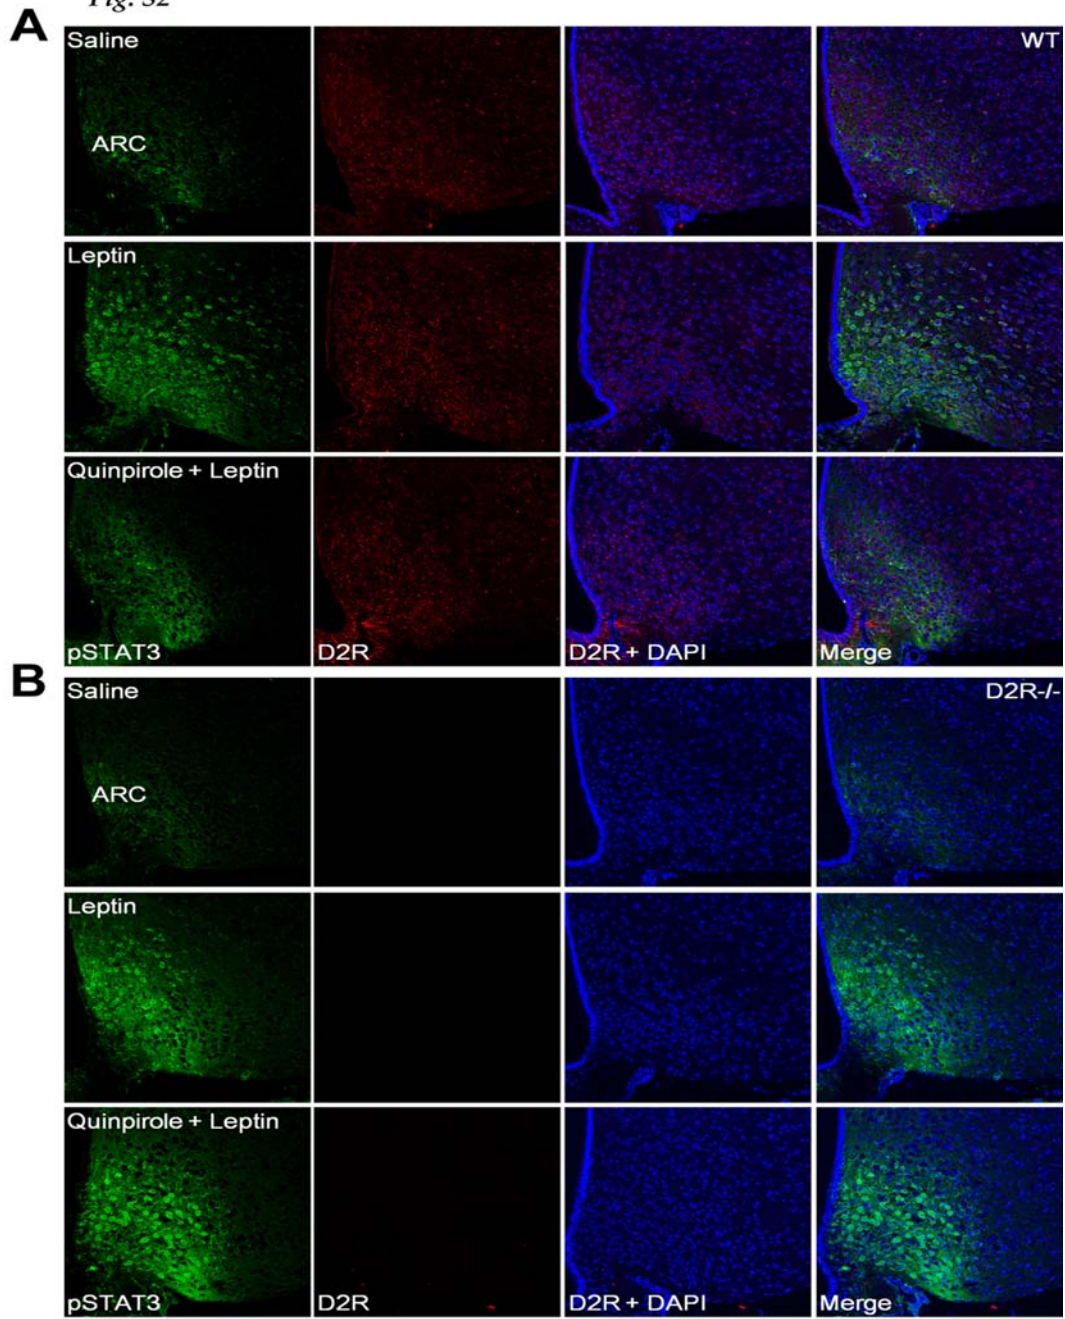

Supplement: supp_M109.079590_jbc.M109.079590-1.pdf [file supp_M109.079590_jbc.M109.079590-1.pdf]
